# Supplementary material
Source: Springer Nature journal article supplement (https://mijn.bsl.nl/resource/supplementary/13047_2011_478_MOESM1_ESM.pdf/7111568)
Supplement: MOESM1 [file 7111568]

## Additional file 1. Systematic review search strategy

|   | <b>Combiners</b>    | <b>Terms</b>                                                                                                                                                                                                                                                                                                                                                                          |
|---|---------------------|---------------------------------------------------------------------------------------------------------------------------------------------------------------------------------------------------------------------------------------------------------------------------------------------------------------------------------------------------------------------------------------|
| 1 | Problem of interest | achill* OR triceps surae OR tendin* OR heel                                                                                                                                                                                                                                                                                                                                           |
| 2 | Outcome             | Pain                                                                                                                                                                                                                                                                                                                                                                                  |
| 3 |                     | #1 AND #2                                                                                                                                                                                                                                                                                                                                                                             |
| 4 | Intervention        | ortho* OR electrotherapy OR therapeutic electric stimulation OR electric stimulation therapy OR heat OR cold OR ice OR inferential therapy OR laser OR exercise therapy OR rehabilitation OR tap* OR strapping OR eccentric* OR exercise therapy OR rehabilitation OR tap* OR strapping OR eccentric OR strengthening OR heel wedge OR heel raise OR heel brace OR shock wave therapy |
| 5 | Limitations         | #3 AND #4<br>English language, humans                                                                                                                                                                                                                                                                                                                                                 |

Individual search terms were mapped to appropriate subject headings (MeSH)

\* wild card/truncation (search term that begin with the letters preceding the asterisk)
